1 **Full title**

2 Sexual risk-taking behavior amongst emerging adults in a tertiary institution of learning in  
3 Coastal Kenya: A qualitative study of stakeholders' perspectives using causal loop mapping

4 **Short title**

5 Sexual risk-taking behavior amongst emerging adults: A qualitative study

6 **Investigators**

7 Stevenson K. Chea<sup>1,2,3\*</sup>, Vincent A. Kagonya<sup>4</sup>, Eunice A. Oyugi<sup>4</sup>, Carophine Nasambu<sup>4</sup>, Isaac  
8 Menza<sup>4</sup>, Fauz Ibrahim<sup>5</sup>, Osman Abdullahi<sup>6</sup>, Alice Anika<sup>7</sup>, Amin S. Hassan<sup>4,6</sup>, Souheila  
9 Abbeddou<sup>3</sup>, Kristien Michielsen<sup>2¶</sup>, Amina Abubakar<sup>4,6,8¶</sup>

10 **Affiliations**

11 <sup>1</sup>Department of Nursing Sciences, School of Health and Human Sciences, Pwani University,  
12 Kilifi, Kenya

13 <sup>2</sup>International Centre for Reproductive Health, Department of Public Health and Primary Care,  
14 Faculty of Medicine and Health Sciences, Ghent University, Ghent, Belgium

15 <sup>3</sup>Public Health Nutrition Unit, Department of Public Health and Primary Care, Faculty of  
16 Medicine and Health Sciences, Ghent University, Ghent, Belgium

17 <sup>4</sup>Centre for Geographic Medicine Research (Coast), Kenya Medical Research Institute/Wellcome  
18 Trust Research Programme, Kilifi, Kenya

19 <sup>5</sup>County Department of Health, Kilifi, Kenya

20 <sup>6</sup>Department of Public Health, School of Health and Human Sciences, Pwani University, Kilifi,  
21 Kenya

22 <sup>7</sup>Department of Educational Psychology, School of Education, Pwani University, Kilifi, Kenya

23 <sup>8</sup>Institute for Human Development, The Aga Khan University, Nairobi, Kenya

24 \* **Corresponding author**

25 E-mail: [cheastevenson@gmail.com](mailto:cheastevenson@gmail.com) (SC)

26 <sup>¶</sup>KM and AAA are joint senior authors

27

## 28 **Abstract**

## 29 **Background**

30 It is known from previous studies that university students in sub-Saharan Africa (sSA) engage in sexual  
31 risk-taking behaviour (SRTB). However, there is paucity of data on correlates of SRTB among university  
32 students (emerging adults {EmA}) at the Kenyan Coast thus hindering intervention planning. This study  
33 seeks to provide an in-depth qualitative understanding of correlates of SRTB and their interconnectedness  
34 among university students at the Kenyan coast combining qualitative research with a systems thinking  
35 approach.

## 36 **Methods**

37 Using the ecological model, and employing in-depth interviews, we explored the perceptions of twenty-  
38 one EmA and five other stakeholders on what constitutes and influences SRTB among EmA at a tertiary  
39 institution of learning in Coastal Kenya. Data were analysed using a thematic framework approach. A  
40 causal loop diagram (CLD) was developed to map the interconnectedness of the correlates of SRTB.

## 41 **Results**

42 Our findings show that unprotected sex, transactional sex, cross-generational sex, multiple sex  
43 partnerships, gender-based violence, sex under influence of alcohol/drugs, early sex debut, and sharing  
44 sex toys were common SRTBs. Based on the ecological model and CLD, most of the reported risk factors  
45 were interconnected and operated at the individual level followed by those that operate at social level.

## 46 **Conclusion**

47 Our study shows that EmA are mostly engaging in unprotected sex. Enhancing sexuality education  
48 programs for students in Kenyan universities and strengthening support systems including counselling for  
49 those using alcohol/drugs may help reduce SRTB among EmA in universities in Kenya.

50 **Key words:** Sexual risk-taking behaviour; emerging adults; systems thinking

## 51 **Background**

52 Sexual risk-taking behaviour (SRTB) including non-condom use [1-4], concurrent sexual partners [5, 6],  
53 multiple sexual partnerships [1, 5, 7-11], early sex debut [5, 10-12], age-disparate relationships [3, 7, 9]  
54 and transactional sex [1, 3, 6, 11, 13] is well documented among young people in sub-Saharan Africa  
55 (sSA) and remains common [14]. Accordingly, sSA bears the greatest burden of HIV infection among  
56 young people [15], with young women and adolescent girls accounting for one in four new infections in  
57 2019, despite making up only 10% of the total population [15]. Although progress has been made towards  
58 scaling down the HIV pandemic, Kenya remains one of the high burden countries in sSA [16]. In 2019, a  
59 total of 41,408 people were newly infected with HIV in Kenya, with 15-29 year old contributing 62% of  
60 all new infections [16].

61 Emerging adulthood is a new conception of development for the period from the late teens through the  
62 twenties, with a focus on ages 18-25 [17]. Emerging adults' (EmA) brains are still developing [18], which  
63 increases risk for sub-optimal performance on executive function with a heightened propensity for  
64 engaging in SRTB as a consequence [18]. Further, concerns of sex tourism and drug abuse reported at the  
65 Kenyan Coast put EmA in this region at a higher risk of SRTB [19, 20]. According to the ecological  
66 model, the mechanisms that underlie SRTB involve multiple explanatory domains [21]. The model  
67 proposes that risk and protective factors of SRTB among young people fall into six domains: 1) macro, ii)  
68 social, iii) school, iv) family, v) peers, and vi) individual [21]. Additionally, there has been less attention  
69 to the causal mechanisms underpinning the occurrence of SRTB among EmA. Systems thinking enables  
70 understanding of inter-relationships and interactions within a system [22]. Causal loop diagrams (CLDs)  
71 are a systems thinking method that can be used to unpack complex health system behaviour [23]. The  
72 current study utilizes CLD to map the system surrounding SRTB.

73 Exploring the experiences of EmA and opinions of other stakeholders on SRTB is important in designing  
74 targeted interventions. Previous studies show that EmA in tertiary institutions of learning in sSA have a

75 higher propensity for non-condom use [10, 24-42], multiple sexual partnerships [10, 24-38, 43], early sex  
76 debut [10, 26, 28, 30, 32, 36, 38, 44], transactional sex [10, 28, 30, 32, 37], age-disparate relationships  
77 [26, 32, 36] and concurrent sexual relationships [25]. Some of the factors underlying SRTB explored in  
78 these studies include socio-demographic factors and relationship/behavioral factors [25, 26, 29, 33, 45]. A  
79 Kenyan study conducted among university of Nairobi students describes younger age, being female,  
80 tobacco use and a previous diagnosis of a sexually transmitted infection (STI) as correlates of SRTB [33].  
81 The University of Nairobi study is quantitative therefore, limiting understanding of the mechanisms  
82 underlying the drivers reported from the participants point of view.

83 Altogether, it is known from previous studies [10, 24-44, 46] that university students in sSA engage in  
84 SRTB, there is paucity of data on correlates of SRTB and their connectedness among university students  
85 at the Kenyan Coast. This study seeks to provide an in-depth qualitative understanding of SRTB among  
86 university students at the Kenyan coast using a systems thinking approach.

## 87 **Methods**

### 88 **Study design**

89 A qualitative study was conducted at Pwani university in Coastal Kenya between October 31<sup>st</sup> 2019 and  
90 March 16<sup>th</sup> 2020. Undergraduate students aged 18-24 years were eligible. Other stakeholders including  
91 the Dean of students, Student Counsellor, and nurses working at the students' health unit and the  
92 university HIV voluntary counselling and testing centre (VCT) were also recruited as key informants.

### 93 **Recruitment**

94 Recruitment of undergraduate students was through snowballing whereas the other key informants were  
95 purposively selected. Initially a meeting was held with undergraduate students to introduce the study.  
96 From this meeting, a few students volunteered to participate in the study. Recruited students

97 recommended other students deemed to be knowledgeable on the subject matter. The process was  
98 repeated with all new interviewees until saturation was reached. To explore diversity, efforts were made  
99 to ensure students recommended for participation were spread across years of study, gender, program of  
100 study and region where they came from. Students who were opinion leaders, specifically those holding  
101 leadership positions in student organizations were given preference as they were deemed to have more  
102 insight on the subject matter. For the other key informants, the Dean of students and other staff who work  
103 closely with the students and on matters around SRTB were purposively recruited.

## 104 **Data collection**

105 We conducted in-depth interviews (IDI) with the students and other key informants. All interviews were  
106 conducted in English. Each interview lasted about an hour and was conducted at a time convenient to  
107 each key informant. Student interviews were conducted in a private room within the VCT. For  
108 convenience, stakeholder interviews were conducted in their offices where privacy was assured.  
109 Participants were each reimbursed Kenyan shillings 350 (an equivalent to about USD 3.00) to compensate  
110 for time spent. Interviews were moderated by the main author (SC) in English and permission for notes  
111 taking and audio recording was sought *a-priori*. An interview guide was earlier developed following the  
112 World Health Organization (WHO) guidelines on school-based student health surveys [47] (S1 File).  
113 Participants' perceptions were explored using general open-ended questions followed by additional  
114 probing where appropriate. Participants' sociodemographic data including date of birth, gender and  
115 program of study were also collected.

## 116 **Data analysis**

117 A distribution of the study participants by their socio-demographic characteristics was done using  
118 frequencies and percentages. Audio recordings from IDIs were transcribed. To ensure the study team  
119 could not directly associate the transcripts with individual participants, identifying information was not

120 included in the transcripts. A thematic framework analysis approach [48], was applied as follows: Firstly,  
121 the transcripts were coded in QSR NVivo 12 (QSR International Ltd, Southport, UK). Initial coding was  
122 guided by major themes from the IDIs and socio-ecological model. New codes and themes were  
123 developed on the basis of the IDI transcripts. Secondly, excerpts were reviewed to identify common  
124 themes and variant views. Codes representing similar themes were collapsed to develop fine codes.  
125 Finally, illustrative verbatim that represent each theme were selected and presented. The interview  
126 numbers used in presenting the verbatim were not known to the study participants or any other person  
127 outside the study team. To develop the CLD, first a causal structure diagram (CSD) (S2 File) was  
128 prepared based on the data (ex-post development) [23] to identify the causal relationships between the  
129 correlates of SRTB. The information from the CSD was then used to develop the CLD using Vensim  
130 software version 9.3.4 (Ventana systems Inc 2015). Where the data did not suggest presence of a  
131 connection between two variables of interest, extra connections were added based on literature, and where  
132 necessary variables renamed, to complete the causal system. In those instances, the additional connections  
133 and variables were indicated in red.

## 134 **Ethical considerations**

135 Prior to recruitment, a written informed consent was obtained from all potential participants. Ethical  
136 clearance was granted by Pwani University Institutional Scientific and Ethics Review Committee  
137 (ERC/PhD/003/2019) and the Kenya Medical Research Institute Scientific and Ethics Review Unit  
138 (KEMRI/SERU/CGMR-C/166/3925). Additionally, administrative approvals were granted by the  
139 National Council for Science Technology and Innovation (NACOSTI/P/19/1142) and Pwani university  
140 (Ref: PU/DVCRE/RSCH/VOL.1/37).

## 141 **Results**

### 142 **Characteristics of participants**



143 IDIs were conducted among students (n = 21) and other stakeholders (PU staff [n = 5]). Of the 26  
 144 participants, the majority was female (n = 16 [62%]). The median age was 21 years (min/max; 18 – 24)  
 145 and 52 years (min/max; 32 – 58) for students and other stakeholders, respectively (Table 1).

146 **Table 1: Characteristics of emerging adults at a tertiary education institution in Coastal Kenya**

| Characteristics           | PU students (n=21)<br>N [%] | PU staff (n=5)<br>N [%] |
|---------------------------|-----------------------------|-------------------------|
| Median (min/max)          | 21 (18-24)                  | 52 (32-58)              |
| <b>Gender</b>             |                             |                         |
| Male                      | 9 [43.0]                    | 1 [20.0]                |
| Female                    | 12 [57.0]                   | 4 [80.0]                |
| <b>Living arrangement</b> |                             |                         |
| In campus                 | 2 [10.0]                    | -                       |
| Outside campus            | 19 [90.0]                   | -                       |
| <b>Level of study</b>     |                             |                         |
| Year 1                    | 3 [14.0]                    | -                       |
| Year 2                    | 7 [33.0]                    | -                       |
| Year 3                    | 5 [24.0]                    | -                       |
| Year 4                    | 6 [29.0]                    | -                       |

147

148 **Perceived forms of SRTB among students**

149 Overall, participants considered unprotected sex, transactional sex, cross-generational sex, multiple sex  
 150 partnerships, gender-based violence, sex under influence of alcohol/drugs, early sex debut and sharing sex  
 151 toys as SRTB. Unprotected sex was considered the most common form of SRTB among students. Others  
 152 were transactional sex, cross-generational sex and multiple sex partnerships (Table 2).

153 **Table 2: Common forms of SRTB**

| SRTB                                 | Key informants<br>(n = 26) | Number of times<br>SRTB described |
|--------------------------------------|----------------------------|-----------------------------------|
| Unprotected sex                      | 26                         | 101                               |
| Transactional sex                    | 25                         | 136                               |
| Cross generational sex               | 25                         | 64                                |
| Multiple sex partners                | 25                         | 67                                |
| Gender-based violence                | 20                         | 51                                |
| Sex under influence of alcohol/drugs | 14                         | 21                                |
| Early sex debut                      | 11                         | 15                                |
| Sharing of sex toys                  | 7                          | 12                                |

154

155 Participants explained that most unprotected sex occurs in the context of sex under the influence of  
156 alcohol/drugs:

157 “A male student... goes out with a female student. Both of them take alcohol, then they engage in the  
158 act[sex]. Of course, alcohol reduces the level of consciousness and once they have taken alcohol, they  
159 won’t even remember usage of condoms.” (Interview 1; key informant)

160 Participants also explained that at times students would just want to feel the pleasure of sex without the  
161 condom barrier. Where students are cohabiting, they would not see the need to use condom with their  
162 partners because they are used to each other. For students engaging in sex with older partners for financial  
163 benefits, unprotected sex would occur if the financier demanded it. At times unprotected sex was  
164 perceived to occur in the context of gender-based violence:

165 “So, this male student decides to take his girlfriend for depo injection [family planning method], reason  
166 being ...they are tired of using condoms, so, he wants to do it raw. So, in that scenario I would say they’re  
167 putting themselves at risk of course for one the boy is not sure if he is the only sexual partner to that lady,  
168 because they are not married ... and the lady is not sure the gentleman is only having her as sexual  
169 partner.” (Interview 1; key informant)

170 Similarly, transactional sex was also described. Transactional sex was mostly characterized by exchange  
171 of money for sex. However, sex for grades or other favors was also described.

172 “Because of financial challenges will involve themselves in sexual activities with adults of course female  
173 adults .... money for them to survive .... The same applies to ladies, they’ll get involved in... sexual  
174 activities with adults, male adults and...they may end up contracting serious diseases.” (Interview 1; key  
175 informant)

176 Cross-generational sex mostly occurred in the context of sugar mummy and sugar daddy relationships  
177 where sex is exchanged for money, material things or favors including good grades.

178 “...particularly our lecturers, the old lecturers, it is called sex for grades, where one doesn’t attend classes,  
179 she has failed, but you find in her transcript it is written she got an A.” (Interview 10; key informant)

180 Multiple sexual partnerships including concurrent partners were also considered to occur in the context of  
181 transactional sex. Participants perceived that economic hardships created the need for multiple partners.

182 “...Okay, our girls at Pwani university what they do they have their peer boyfriend, I mean a boyfriend of  
183 their age and then... they look for another man who will be giving them money because this boyfriend  
184 doesn’t have money. I can ...call them ceremonial boyfriends...who will be financing them, herself and her  
185 boyfriend...This one mostly is an elder person, ...almost their father’s age. And this is not good because  
186 these older men don’t consider using protection...” (Interview 26; key informant)

187 Gender-based violence was also considered common and often took the form of forced sex and  
188 predominantly involved girls as victims. A male partner would use physical force or offer alcohol to the  
189 girl with the aim of sleeping with her when she is drunk. At times, non-alcoholic drinks laced with drugs  
190 would be offered.

191 “There are situations where the students engage in sex without consent from one party. So, one party is  
192 forced to accept. So, in the process they don’t even think of condoms.” (Interview 1; key informant)

193 “They do take advantage of ladies mostly when they go to clubs. These guys have an intention of having  
194 sex with this girl... and they take her to the club and...give her some drug, or alcohol in excess ... then  
195 they say “*anableki*” [becomes unconscious], so, after that you find yourself in a room with different guys so  
196 they end up having sex with you, you end up getting disease, maybe HIV or STIs.” (Interview 16; key  
197 informant)

198 Sex under the influence of alcohol/drugs was considered risky as it was frequently unprotected.

199 “When people are into drugs they forget themselves and find themselves doing that act [sex] may be not  
200 protected then they can contract [STIs].” (Interview 17; key informant)

201 It was perceived that those engaging in SRTB are likely to have started sexual activities at an early age.  
202 Some participants felt that sexual debut could occur even among nine-year olds.

203 “The age at which for lady to begin early sex even can start at the age of 9 years and for the men maybe 12  
204 years.” (Interview 5; key informant)

205 Sharing of sex toys among lesbians was also reported and could facilitate transmission of STI including  
206 HIV.

207 “The lesbians...use those tools [toys]. ...maybe it is a group of lesbians and maybe they are using that one  
208 vibrator and you never know if one has the STI through that they may contract.” (Interview 12; key  
209 informant)

## 210 **Risk and protective factors for SRTB among students**

211 The respondents identified a number of risk and protective factors for SRTB. Based on the ecological  
212 model, most of the reported risk factors operated at the individual level followed by those at social family  
213 and peer level. Similarly, most of the reported protective influences operated at the individual level (Fig 1  
214 and Table 3).

### 215 **Fig 1: A flow diagram of emerging adults’ and other stakeholders’ perceived risk and protective** 216 **factors for sexual risk taking behaviour among emerging adults at a tertiary education institution** 217 **in Coastal Kenya**

218 The CLD demonstrated the interconnectedness of the correlates of SRTB as illustrated by the numerous  
219 feedback mechanisms that influence SRTB. Transactional sex, cross generational sex and multiple sex  
220 partnerships formed a reinforcing feedback loop in which each had an incremental effect on the other.  
221 The loop was driven by sex tourism, visibility of sugar mummies/daddies on social media, financial  
222 difficulties, poor academic performance, acceptance of sex drive in women and men, traditional gender  
223 norms, liberal sexual norms and the desire to acquire material things. However, being mature reduced  
224 transactional sex, which consequently had the same effect on all components of the loop.

225 Similarly, societal acceptance of unsafe sexual practices seemed to increase unprotected sex and formed a  
226 reinforcing loop with it. Transactional sex, having lots of free time, sexual violence, sex under influence

227 of alcohol/drugs and false beliefs about condoms increased unprotected sex therefore introducing an  
228 incremental effect on the reinforcing loop between unprotected sex and societal acceptance of unsafe sex.  
229 However, adherence to religious principles, parental control and ability to negotiate safe sex reduced  
230 unprotected sex. (Fig 2).

231 **Fig 2: A causal loop diagram showing risk and protective factors that impact sexual risk-taking**  
232 **behaviour among emerging adults at a tertiary education institution in Coastal Kenya.** Arrows and  
233 variables in red have been added based on literature to make the causal loop diagram complete

234 **Table 3: Risk and protective factors of sexual risk-taking behaviour and exemplifying statements**

235

| Factor level       | Factor             | Exemplifying statement                                                                                                                                                                                                                                                                                                                                                                                                                                                                                                                                                                                                                                                                                                                                      |                                                                                                                                                                                                                                                                                                                                                                                                                                                                                                                                                                            |
|--------------------|--------------------|-------------------------------------------------------------------------------------------------------------------------------------------------------------------------------------------------------------------------------------------------------------------------------------------------------------------------------------------------------------------------------------------------------------------------------------------------------------------------------------------------------------------------------------------------------------------------------------------------------------------------------------------------------------------------------------------------------------------------------------------------------------|----------------------------------------------------------------------------------------------------------------------------------------------------------------------------------------------------------------------------------------------------------------------------------------------------------------------------------------------------------------------------------------------------------------------------------------------------------------------------------------------------------------------------------------------------------------------------|
| Individual         | Risk               | Alcohol/drug use                                                                                                                                                                                                                                                                                                                                                                                                                                                                                                                                                                                                                                                                                                                                            | ...People are normally raped because they... served juice which maybe has been laced with alcohol or whatever, in the morning they come crying .....for PEP [Post exposure prophylaxis] ...rape has taken place and ...                                                                                                                                                                                                                                                                                                                                                    |
|                    |                    | Biological vulnerability                                                                                                                                                                                                                                                                                                                                                                                                                                                                                                                                                                                                                                                                                                                                    | ...some do it[sex] for pleasure, some people who drive pleasure by having many boyfriends... they want the sex they don't want the commitment...that is why disease and pregnancy [are common] ...                                                                                                                                                                                                                                                                                                                                                                         |
|                    |                    | Mental health disorders                                                                                                                                                                                                                                                                                                                                                                                                                                                                                                                                                                                                                                                                                                                                     | ...when a person is depressed they may not be in a position to ... make the right decision ... and they may engage more in risky behaviour, they might have reached a point where they don't care about anything and therefore taking measures to have safe sex may not be in their minds in that depressed state...                                                                                                                                                                                                                                                       |
|                    |                    | Low HIV risk perception                                                                                                                                                                                                                                                                                                                                                                                                                                                                                                                                                                                                                                                                                                                                     | ...some don't simply because they have a girlfriend and that girlfriend... may not want. For example, I live with a girl in my house, you know condom...becomes boring because you are with her there every now and then... but to others they may stop using simply a lady can tell you why have you decided to use a condom on me don't you trust me...                                                                                                                                                                                                                  |
|                    |                    | Having lots of free time                                                                                                                                                                                                                                                                                                                                                                                                                                                                                                                                                                                                                                                                                                                                    | ...Idleness ... because there is nothing you do so some will ...go hung around...they date or sleep somewhere with somebody she or he doesn't know their [HIV] status...and the end of it all you find that the person you were with may be had HIV...                                                                                                                                                                                                                                                                                                                     |
|                    |                    | Inability to negotiate safe sex                                                                                                                                                                                                                                                                                                                                                                                                                                                                                                                                                                                                                                                                                                                             | ... yes, they will do it [unprotected sex] willingly...what this boy will tell you is 'if you don't do it then I will leave you' then others fear they don't have that power to refuse.                                                                                                                                                                                                                                                                                                                                                                                    |
|                    | Materialism        | ... this occurs mostly to the girls, like if your parents are not giving you enough money to support you in the university or you are greedy you see may be the money they are giving you is for food, just for food but you want more, you want to do your hair, you want your house to look good, to have good furniture, you want to go for vacation every weekend like you want to live a good life and you don't have the money for that good life and your parents don't have the money, so you find that they will go look for those sponsors because those sponsors like the old men usually want the young girls and they will do anything for you as long as you are ... having sex with them... they will give you any kind of money you want... |                                                                                                                                                                                                                                                                                                                                                                                                                                                                                                                                                                            |
| Protective         | Being older/mature | ...the older students some of them are mature... most of them know what is good and what is bad for them but the younger students they have no limit they are not guided to know what is good and what is bad they take everything for fun                                                                                                                                                                                                                                                                                                                                                                                                                                                                                                                  |                                                                                                                                                                                                                                                                                                                                                                                                                                                                                                                                                                            |
|                    | Being female       | ...it is not easy for a girl because ...they do the sexual [activities] from the heart but the men do it for pleasure just to satisfy their desire that time and they go ...so it is not easy for a girl to engage in sex easily but for the male students it is very easy ...                                                                                                                                                                                                                                                                                                                                                                                                                                                                              |                                                                                                                                                                                                                                                                                                                                                                                                                                                                                                                                                                            |
|                    | Being religious    | ...A religion such as Muslim...you'll find their religion has limited the girls to engage in sexual activities before marriage...                                                                                                                                                                                                                                                                                                                                                                                                                                                                                                                                                                                                                           |                                                                                                                                                                                                                                                                                                                                                                                                                                                                                                                                                                            |
| Social environment | Risk               | Social events                                                                                                                                                                                                                                                                                                                                                                                                                                                                                                                                                                                                                                                                                                                                               | ...This student decided to go for freshers' night [party for new students]. And I had warned her earlier, I had told her that thing isn't beneficial to you in any case, but she forced out and attended. So, when ...she went home she called me and told me I'm feeling unwell. I asked why? How are you feeling? I'm feeling like vomiting, I have stomach ache that is crampy. Since when? Around 3 days ago. Then I told her those looks like signs of pregnancy so please go to the hospital, get a kit and test. So, when she did that the results were positive... |
|                    |                    | Drugs available & cheap in campus                                                                                                                                                                                                                                                                                                                                                                                                                                                                                                                                                                                                                                                                                                                           | ...They are several, they are just around the place, they can get them very easily, and they are being sold very cheaply...                                                                                                                                                                                                                                                                                                                                                                                                                                                |
|                    |                    | Social media                                                                                                                                                                                                                                                                                                                                                                                                                                                                                                                                                                                                                                                                                                                                                | ... [they find the sponsor/sugar daddy] on face book...                                                                                                                                                                                                                                                                                                                                                                                                                                                                                                                    |
|                    |                    | Tourism                                                                                                                                                                                                                                                                                                                                                                                                                                                                                                                                                                                                                                                                                                                                                     | You know this is coast there are rich people[tourists] around the beaches... some people do not have the boundaries of knowing you are dating a person almost your father age... an old guy approaches you he gives you his number "anaanza kukukatia unaingia box" [he seduces you and you give in] ...some people can go for it because of the money                                                                                                                                                                                                                     |
|                    | Protective         | Drugs being expensive                                                                                                                                                                                                                                                                                                                                                                                                                                                                                                                                                                                                                                                                                                                                       | Some inject but ...they rarely do it... you know... injection drugs are very expensive... so most of them normally students don't afford it...                                                                                                                                                                                                                                                                                                                                                                                                                             |
| Peer               | Risk               | Negative peer influence                                                                                                                                                                                                                                                                                                                                                                                                                                                                                                                                                                                                                                                                                                                                     | Girls especially, they are not able to make quite good decisions, and this led them to being harassed or lured into sex and latter you'll find out they have not used protection                                                                                                                                                                                                                                                                                                                                                                                           |
|                    | Protective         | Positive peer influence                                                                                                                                                                                                                                                                                                                                                                                                                                                                                                                                                                                                                                                                                                                                     | ...you are talking about the same issues you can share your personal issues or you can share to the group what you went through and how you have become, it helps                                                                                                                                                                                                                                                                                                                                                                                                          |
| Family             | Risk               | Financial difficulties                                                                                                                                                                                                                                                                                                                                                                                                                                                                                                                                                                                                                                                                                                                                      | Because of financial challenges will involve themselves in sexual activities with ... female adults to get money ... to survive.... The same applies to... university ladies, they'll get involved in... sexual activities...with male adults and... end up contracting serious diseases                                                                                                                                                                                                                                                                                   |
|                    |                    | Financial stability                                                                                                                                                                                                                                                                                                                                                                                                                                                                                                                                                                                                                                                                                                                                         | Then there is HELB money [student loan] that comes in ...comrades [students] gather then they so many parties.... like parting and in those parties, alcohols are the accompaniment, sometimes in the rentals we hear them shouting... but eventually I think illicit sex takes place...                                                                                                                                                                                                                                                                                   |
|                    |                    | Lack of parental monitoring                                                                                                                                                                                                                                                                                                                                                                                                                                                                                                                                                                                                                                                                                                                                 | That one [SRTB] will mostly depend with parental care you have at home... at an early age below 18 it is mostly influenced by the lack of proper parenting...                                                                                                                                                                                                                                                                                                                                                                                                              |
|                    | Protective         | Strict home environment                                                                                                                                                                                                                                                                                                                                                                                                                                                                                                                                                                                                                                                                                                                                     | When you are at home the chances of being lured [into SRTB] are very low...when your home ground is so strict...                                                                                                                                                                                                                                                                                                                                                                                                                                                           |

|        |                   |                           |                                                                                                                                                                                                                                                |
|--------|-------------------|---------------------------|------------------------------------------------------------------------------------------------------------------------------------------------------------------------------------------------------------------------------------------------|
| School | <i>Risk</i>       | School environment        | Ladies end up having sex with different guys because ... she loved this guy who broke her heart, so she ends up sleeping with anyone...                                                                                                        |
|        |                   | Living outside school     | If they are out there [residence outside campus] ... they have the freedom... then it means they can involve in anything and as youth we know there are many challenges particularly on alcohol and drug abuse, matters of sexual behaviour... |
|        |                   | Poor academic performance | ...they make...poor judgment in their academics this results to their failure and causes them to engage in sexual behaviour which are risky...                                                                                                 |
|        | <i>Protective</i> | School policies/rules     | ...the university issue condoms to all students free...                                                                                                                                                                                        |
| Macro  | <i>Risk</i>       | False belief about condom | There is that notion that when you put on a condom, the sexual effect is not as sweet as when you are not using...                                                                                                                             |
|        | <i>Protective</i> | Punitive action           | In campus you will face the consequences definitely you would like to engage [in SRTB] out there...                                                                                                                                            |

236

237 ***Individual level factors***

238 **Risk factors**

239 *Alcohol/drug use:* Participants explained that alcohol/drug use was a contributing factor to SRTB. In  
240 some instances, male students would buy alcohol for girls with the intention of engaging in sex with them  
241 once they get drunk. In these circumstances the male partner is taking advantage of the drunk state of the  
242 girl. Where the girl is still conscious enough to resist, the male partner would use force. Participants also  
243 narrated that at times the intention to take advantage of one partner was not there but sexual risk  
244 behaviour would still happen because alcohol impedes their decision making. In addition, it was revealed  
245 that risky sexual behaviors were happening after abusing drugs other than alcohol.

246 “People are normally raped because they... served juice which maybe has been laced with alcohol or  
247 whatever, in the morning they come crying .....for PEP [Post exposure prophylaxis] ...rape has taken place  
248 and ....” (Interview 25; key informant).

249 “They have group sex, and they have it when they are also drunk, so I think when somebody is drunk ...  
250 they cannot decide very well, even if they wanted to use a condom for example, they will not use it. So, and  
251 the gay also some of them don’t even consider the condom they just do it without condom. And then they  
252 come back and tell me they want to access the PEP...” (Interview 26; key informant).

253 *Biological/psychological vulnerability:* Participants felt that biological factors including sex and personal  
254 characteristics like being inclined to have fun, curiosity/wanting to explore and wanting to be famous  
255 were contributing to SRTB by emerging adults. Interestingly, both male and female sex were reported to  
256 increase vulnerability to SRTB though most participants were of the view that being male was a  
257 contributing factor to SRTB.

258 “...some do it[sex] for pleasure, some people who drive pleasure by having many boyfriends... they want  
259 the sex they don’t want the commitment...that is why disease and pregnancy [are common].” (Interview  
260 14; key informant).



261 *Mental health disorders:* Mental health disorders especially depression and anxiety were perceived to be  
262 pushing EmA to engage in alcohol and subsequently SRTB.

263 “...when a person is depressed they may not be in a position to ... make the right decision ... and they may  
264 engage more in risky behaviour, they might have reached a point where they don’t care about anything and  
265 therefore taking measures to have safe sex may not be in their minds in that depressed state.” (Interview 23;  
266 key informant).

267 *Low HIV risk perception:* Participants reported that EmA who believe have low chances of contracting  
268 HIV were more likely to engage in SRTB. Participants reported that EmAs would engage in sex without  
269 condom because they do not like using condom, have negative perception about it or they are used to their  
270 partner so do not see the need to use condom. Further, low HIV risk perception among EmA was  
271 exemplified by other risky activities/beliefs that they were reported to engage in including deep kissing  
272 and fear of pregnancy but not HIV infection.

273 “...some don’t simply because they have a girlfriend and that girlfriend... may not want. For example, I  
274 live with a girl in my house, you know condom... becomes boring because you are with her there every now  
275 and then... but to others they may stop using simply a lady can tell you why have you decided to use a  
276 condom on me don’t you trust me?” (Interview 20; key informant).

277 *Having a lot of free time and inability to negotiate safe sex:* These were also seen to contribute to SRTB.  
278 Participants explained that students with a lot of free time tend to spend that time thinking about and  
279 engaging in SRTB.

280 “Idleness ... because there is nothing you do so some will ...go hung around...they date or sleep  
281 somewhere with somebody she or he doesn’t know their [HIV] status...and the end of it all you find that  
282 the person you were with may be had HIV.” (Interview 5; key informant).

283 “Yes, they will do it [unprotected sex] willingly...what this boy will tell you is ‘if you don’t do it then I  
284 will leave you’ then others fear they don’t have that power to refuse.” (Interview 12; key informant).

285 *Materialism:* Participants revealed that the love for money and material things was pushing especially

286 ladies into transactional sex just to maintain their desired lifestyle.

287 “... this occurs mostly to the girls, like if your parents are not giving you enough money to support you in  
288 the university or you are greedy you see may be the money they are giving you is for food, just for food but  
289 you want more, you want to do your hair, you want your house to look good, to have good furniture, you  
290 want to go for vacation every weekend like you want to live a good life and you don’t have the money for  
291 that good life and your parents don’t have the money, so you find that they will go look for those sponsors  
292 because those sponsors like the old men usually want the young girls and they will do anything for you as  
293 long as you are ... having sex with them... they will give you any kind of money you want.” (Interview 12;  
294 key informant).

## 295 Protective factors

296 *Being older/mature:* Participants explained that unlike the younger/junior students, mature students are  
297 focused on future life and academics and generally know what is good for them so they are more likely to  
298 make right decisions regarding sexual matters.

299 “The older students some of them are mature... most of them know what is good and what is bad for them  
300 but the younger students they have no limit they are not guided to know what is good and what is bad they  
301 take everything for fun.” (Interview 4; key informant).

302 *Being female:* It was revealed that males are more prone to careless sex because they do it for pleasure  
303 with no emotional attachment unlike girls.

304 “It is not easy for a girl because ...they do the sexual [activities] from the heart but the men do it for  
305 pleasure just to satisfy their desire that time and they go ...so it is not easy for a girl to engage in sex easily  
306 but for the male students it is very easy.” (Interview 12; key informant).

307 *Being religious:* Religion was perceived to help reduce SRTB since most religions prohibit sex before  
308 marriage.

309 “A religion such as Muslim...you’ll find their religion has limited the girls to engage in sexual activities  
310 before marriage.” (Interview 10; key informant).

311 ***Social environment factors***

312 **Risk factors**

313 *Social events:* Participants narrated that social events organized both inside and outside campus provided  
314 an opportunity for students to engage in SRTB. Freedom enjoyed by the students especially outside  
315 campus was perceived to facilitate SRTB during the social events.

316 “This student decided to go for freshers’ night [party for new students]. And I had warned her earlier, I had  
317 told her that thing isn’t beneficial to you in any case, but she forced out and attended. So, when ...she went  
318 home she called me and told me I’m feeling unwell. I asked why? How are you feeling? I’m feeling like  
319 vomiting, I have stomach ache that is crampy. Since when? Around 3 days ago. Then I told her those looks  
320 like signs of pregnancy so please go to the hospital, get a kit and test. So, when she did that the results were  
321 positive.” (Interview 1; key informant).

322 *Drugs/alcohol available and cheap around campus:* Participants felt that alcohol and other drugs were  
323 readily available and cheap around campus which increased the risk of engaging in sex while under  
324 influence of the drugs.

325 “They are several, they are just around the place, they can get them very easily, and they are being sold  
326 very cheaply.” (Interview 26; key informant).

327 *Social media:* Social media use was seen to predispose students to SRTB. Participants narrated how  
328 students connect with their sugar mummies/daddies on Facebook. Further, they explained that students  
329 watch pornography which fuels their curiosity to try it out.

330 “[they find the sponsor/sugar daddy] on face book.” (Interview 12; key informant).

331 *Tourism:* It was perceived that tourism contributed to SRTB. Since the university is located along the  
332 Kenyan Coast, some tourists, usually old, along the beaches were targeting female students. The students  
333 would in turn give in as they expect to benefit financially.

334 “You know this is coast there are rich people[tourists] around the beaches... some people do not have the  
335 boundaries of knowing you are dating a person almost your father age... an old guy approaches you he  
336 gives you his number “*anaanza kukukatia unaingia box*” [he seduces you and you give in] ...some people  
337 can go for it because of the money.” (Interview 14; key informant).

### 338 Protective factors

339 *Drugs being expensive:* While participants felt that drugs were easily accessible and cheap, especially  
340 palm wine, locally known as “mnazi”, there were also expensive drugs that students could not access.  
341 This keeps them sober hence reducing the chances of engaging in SRTB.

342 “Some inject but ...they rarely do it... you know...injection drugs are very expensive... so most of them  
343 normally students don’t afford it...” (Interview 10; key informant).

### 344 *Peer level factors*

#### 345 Risk factors

346 *Negative peer influence:* Most participants felt that close friends can influence others into risky sexual  
347 encounters. Some of the negative influences include non-condom use during a sexual encounter while  
348 drunk.

349 “Girls especially, they are not able to make quite good decisions, and this led them to being harassed or  
350 lured into sex and latter you’ll find out they have not used protection.” (Interview 10; key informant).

#### 351 Protective factors

352 *Positive peer influence:* Sharing experiences by peers was seen to help them overcome common  
353 challenges.

354 “... you are talking about the same issues you can share your personal issues or you can share to the group  
355 what you went through and how you have become, it helps.” (Interview 14; key informant).

356 ***Family level factors***

357 **Risk factors**

358 *Financial difficulties/poverty:* Participants narrated that due to financial challenges, students would  
359 engage in SRTB in order to cater for their needs.

360 “Because of financial challenges will involve themselves in sexual activities with ... female adults to get  
361 money ... to survive.... The same applies to... university ladies, they’ll get involved in... sexual  
362 activities...with male adults and.... end up contracting serious diseases.” (Interview 1; key informant).

363 *Financial stability:* Though financial difficulties were perceived to predispose to SRTB, financial stability  
364 was equally perceived to have the same effect. Financially stable students or those with well-off friends  
365 were more predisposed to SRTB because they could afford the expenses associated with such activities  
366 including going out for social events with their partners.

367 “Then there is HELB money [student loan] that comes in ...comrades [students] gather then they so many  
368 parties.... like parting and in those parties, alcohols are the accompaniment, sometimes in the rentals we  
369 hear them shouting... but eventually I think illicit sex takes place.” (Interview 25; key informant).

370 *Lack of parental monitoring:* Decision making on sexual matters was seen to be influenced by parental  
371 care that one receives at an early age. Lack of close parental monitoring was seen to negatively influence  
372 decision making regarding sexuality leading to SRTB.

373 “That one [SRTB] will mostly depend with parental care you have at home... at an early age below 18 it is  
374 mostly influenced by the lack of proper parenting.” (Interview 2; key informant).

375 **Protective factors**

376 *Strict home environment:* A strict home environment where there is close parental monitoring was  
377 perceived to offer protection from being lured into SRTB.

378 “When you are at home the chances of being lured [into SRTB] are very low...when your home ground is  
379 so strict.” (Interview 24; key informant).

### 380 *School level factors*

#### 381 Risk factors

382 *School environment:* Participants explained that some factors within the school environment could  
383 predispose students to SRTB. Most participants pointed out that sexual relationships in campus are  
384 temporary and sometimes students find themselves engaging in SRTB to cope with heart break following  
385 break-up of a relationship. Similarly, campus freedom that allows students to have sexual relationships  
386 and weak security systems at campus were blamed for SRTB among students.

387 “Ladies end up having sex with different guys because ... she loved this guy who broke her heart, so she  
388 ends up sleeping with anyone.” (Interview 16; key informant).

389 *Living outside school:* Compared to residence within campus, participants were of the view that residing  
390 outside campus exposed students to SRTB. This is because the campus freedoms are there but are  
391 practiced within the rules in campus. This is not the case outside campus where the campus rules do not  
392 apply.

393 “If they are out there [residence outside campus] .... they have the freedom... then it means they can  
394 involve in anything and as youth we know there are many challenges particularly on alcohol and drug  
395 abuse, matters of sexual behaviour.” (Interview 22; key informant).

396 *Poor academic performance:* Participants explained that when students perform poorly in academics,  
397 some get depressed and end up engaging in SRTB. Female students performing poorly would be ready to  
398 have risky sexual relations with lecturers to rescue themselves.

399 “... they make...poor judgment in their academics this results to their failure and causes them to engage in  
400 sexual behaviour which are risky.” (Interview 10; key informant).

## 401 Protective factors

402 *School rules or policies:* Participants felt that school policies and rules which directly affects those living  
403 in campus stops students from engaging in SRTB. Examples of policies include restriction of alcohol use  
404 and provision of mental health counselling services on campus which keeps frustrated students from  
405 engaging in SRTB as a way of coping. Similarly, provision of condom on campus was mentioned.

406 “... the university issue condoms to all students free.” (Interview 25; key informant).

## 407 *Macro level factors*

### 408 Risk factors

409 *False beliefs about condoms:* Participants explained that some students were not using condom because  
410 of certain beliefs. Some believed that condoms reduce sexual pleasure while others believe condoms will  
411 burst.

412 “There is that notion that when you put on a condom, the sexual effect is not as sweet as when you are not  
413 using...” (Interview 24; key informant).

### 414 Protective factors

415 *Punitive action:* It was revealed that negative consequences imposed on students for engaging in SRTB  
416 makes them shy away from it. Participants explained that students caught engaging in sex in public spaces  
417 within campus due to influence of alcohol face consequences including expulsion from the university.

418 “In campus you will face the consequences definitely you would like to engage [in SRTB] out there.”  
419 (Interview 23; key informant).

## 420 Discussion

421 In this study we set out to understand the perceived SRTBs among EmA and associated risk factors. Our  
422 findings show that EmA and other stakeholders perceived SRTB to be common at an institution of higher  
423 learning in Coastal Kenya, especially unprotected sex, transactional sex, cross generational sex, multiple  
424 sexual partnerships, gender-based violence, sex under influence of alcohol/drugs, early sex debut, and  
425 sharing sex toys. Biological/psychological vulnerability, negative peer influence, alcohol/drug use and  
426 financial difficulties were most frequently described as drivers of SRTB in this population.

427 Unprotected sex, sex under the influence of alcohol/drugs and gender-based violence were described to be  
428 common among the EmA. Further, the CLD shows that the three are interlinked with gender-based  
429 violence and sex under influence of alcohol/drugs increasing unprotected sex. Consistent with our  
430 findings, previous studies from sSA have found unprotected sex to be the most common SRTB which  
431 underscores its importance [14]. Indeed, a recent systematic review and meta-analysis of EmA age 18-25  
432 years from Africa found that non-condom use had the highest pooled prevalence estimate of 46% [14].  
433 Participants explained that alcohol/drugs impair judgement hence when engaging in sex while under  
434 influence, EmA may not bother using a condom and if they do, it will not be used correctly. In addition,  
435 gender-based violence seems to be fueled by alcohol/drug use in this population. Social events organized  
436 both on and off campus provide an opportunity for alcohol/drug use. In these circumstances, perpetrators  
437 of gender-based violence would offer alcohol/drugs to the targeted victims then assault them sexually. It  
438 is possible that alcohol/drug use and the social events could be behind unprotected sex, sex under  
439 influence of alcohol and gender-based violence in this population as it has been found in other studies  
440 [14] and confirmed in the CLD where alcohol/drug use increases sex under influence of alcohol/drugs  
441 which in turn increases unprotected sex. There is need for universities to strengthen mental health support  
442 services including counselling to help reduce alcohol/drug use among EmA [49].

443 Transactional sex, cross generational sex and multiple sex partners were perceived to be common  
444 amongst EmA and mainly occurred in the context of sex in exchange of money. Further, the CLD shows  
445 that the three SRTBs are interlinked in a reinforcing loop in which transactional sex increases cross



446 generational sex which then increases multiple sex partnerships that further increases transactional sex in  
447 a vicious cycle. A recent review equally found transactional sex, cross-generational sex and multiple sex  
448 partnerships to be prevalent among EmA in sSA [14]. Similarly, financial difficulties came out strongly  
449 among participants as a risk factor for transactional sex. The Kenyan government rolled out free primary  
450 education in 2003 which substantially increased primary school enrollment [50]. Additionally, the  
451 government has in recent years been implementing the 100% transition policy which aims to ensure all  
452 primary school pupils progress to secondary school and later either join university or middle level  
453 colleges [51]. These two factors may have contributed to the steady increase in public university  
454 enrollment from 442,000 in 2015 to 1,000,000 in 2018 [52]. Interestingly, government funding in the  
455 higher education sector has either stagnated or reduced [52]. Though tuition fees in public universities  
456 remain affordable, public universities have had to find ways to bridge the funding gap. Many public  
457 universities have passed certain costs to parents/students, example is industrial attachment which students  
458 are currently paying for directly. Apart from universities passing costs to students, students' financial  
459 burden has further been increased by the fact that the higher education loans board, a government body  
460 that provides loans to university students to help them fund their education, has not been able to cope with  
461 the increasing number of students [53]. Further, loan recovery has been a challenge due to the high youth  
462 unemployment rate in Kenya [53]. Disbursements have therefore been inadequate for those who secure  
463 the loan while many miss out altogether [53]. Students welfare has also posed a challenge as most  
464 students are accommodated outside campus therefore paying rent at market price. It is possible that the  
465 fore mentioned factors may have rendered university education expensive hence many parents struggle to  
466 support their children. Under these circumstances, it is plausible that some students engage in  
467 transactional sex, cross generational sex and multiple sex partnerships to cater for their needs at the  
468 university. However, materialism and peer pressure were also described to be risk factors for SRTB. It is  
469 possible that the desire to acquire material things to maintain an expensive life style like their financially-  
470 stable peers was pushing EmA to engage in transactional sex, cross generational sex and multiple sex  
471 partnerships like it has been demonstrated in previous studies [54]. The CLD confirms that financial

472 difficulties and desire to acquire material things directly increase transactional sex, cross generational sex  
473 and multiple sex partnerships. Kenyan universities need to enhance sexual education programs for  
474 students so that they can be empowered and avoid the urge to engage in SRTB for financial gain [55].  
475 Although transactional sex mainly involved exchanging sex for money, sex for favorable grades was also  
476 reported. A previous study among adolescents in this setting equally revealed that transactional sex was  
477 common but it did not involve exchange of sex for favorable grades despite the fact that some of the  
478 adolescents were school-going [54]. It seems exchange of sex for favorable grades is a common form of  
479 transactional sex among young people in universities but not those in high schools or primary schools.  
480 Kenyan universities have administrative procedures to deal with sex for grades. It is probably time for the  
481 universities to review those procedures and strengthen them to ensure such cases are reduced.

482 One strength of this study is the use of CLD to map the SRTB system in this population. An important  
483 limitation of this study is that it only involved participants from one university. It remains unclear if their  
484 views could differ from those in other universities given the geographical differences.

## 485 **Conclusion**

486 This study explored SRTB among EmA at a public university in Coastal Kenya. Consistent with findings  
487 from studies among EmA in general population, our study shows that EmA are engaging in SRTB with  
488 unprotected sex perceived to be the most common and seems to be driven by individual level factors  
489 especially alcohol/drug use. In a unique way, our study utilizes systems thinking approach to build on  
490 existing literature by highlighting the perceived drivers of SRTB among university students and their  
491 interlinkages. Enhancing sexual education programs for university students in Kenya and strengthening  
492 support systems including counselling for those using alcohol/drugs may help reduce SRTB among EmA  
493 in universities in Kenya.

## 494 **Acknowledgement**

495 The authors would like to thank all participants for volunteering to take part in this study. Further, the  
496 authors are grateful to Karabu Ngombo (CGMR- Coast, Kenya) and Judith Tumaini Dzombo (CGMR-  
497 Coast, Kenya) for their help during data collection. This manuscript was submitted for publication with  
498 permission from the Director of the Kenya Medical Research Institute/Wellcome Trust Research  
499 Programme.

## 500 References

- 501 1. Gibbs A, Hatcher A, Jewkes R, Sikweyiya Y, Washington L, Dunkle K, et al. Associations  
502 between Lifetime Traumatic Experiences and HIV-Risk Behaviors among Young Men Living in  
503 Informal Settlements in South Africa: A Cross-Sectional Analysis and Structural Equation Model.  
504 Journal of Acquired Immune Deficiency Syndromes. 2019;81(2):193-201.  
505 <http://dx.doi.org/10.1097/QAI.0000000000002010>.
- 506 2. Knox J, Reddy V, Lane T, Lovasi GS, Hasin D, Sandfort T. Safer sex intentions modify the  
507 relationship between substance use and sexual risk behavior among black South African men who  
508 have sex with men. International Journal of STD and AIDS. 2019;30(8):786-94.  
509 <http://dx.doi.org/10.1177/0956462418825333>.
- 510 3. Masa R, Graham L, Khan Z, Chowa G, Patel L. Food insecurity, sexual risk taking, and sexual  
511 victimization in Ghanaian adolescents and young South African adults. International journal of  
512 public health. 2019;64(2):153-63. <http://dx.doi.org/10.1007/s00038-018-1155-x>.
- 513 4. Price J, Pettifor A, Selin A, Wagner RG, MacPhail C, Agyei Y, et al. The association between  
514 perceived household educational support and HIV risk in young women in a rural South African  
515 community (HPTN 068): A cross sectional study. PloS one. 2019;14(1):e0210632.  
516 <http://dx.doi.org/10.1371/journal.pone.0210632>.
- 517 5. Tarkang EE, Pencille LB, Dadah E, Nzegge MM, Komesuor J. Highly prevalent at-risk sexual  
518 behaviours among out-of-school youths in urban Cameroon. The Pan African medical journal.  
519 2018;30:254. <http://dx.doi.org/10.11604/pamj.2018.30.254.15775>. PMID:6317297
- 520 6. Yamanis TJ, Fisher JC, Moody JW, Kajula LJ. Young Men's Social Network Characteristics and  
521 Associations with Sexual Partnership Concurrency in Tanzania. AIDS and behavior.  
522 2016;20(6):1244-55. <http://dx.doi.org/10.1007/s10461-015-1152-5>.
- 523 7. Ziraba A, Orindi B, Muuo S, Floyd S, Birdthistle IJ, Mumah J, et al. Understanding HIV risks  
524 among adolescent girls and young women in informal settlements of Nairobi, Kenya: Lessons for  
525 DREAMS. PloS one. 2018;13(5):e0197479. <http://dx.doi.org/10.1371/journal.pone.0197479>.
- 526 8. VanderEnde K, Chiang L, Mercy J, Shawa M, Hamela J, Maksud N, et al. Adverse Childhood  
527 Experiences and HIV Sexual Risk-Taking Behaviors Among Young Adults in Malawi. Journal of  
528 interpersonal violence. 2018;33(11):1710-30. <http://dx.doi.org/10.1177/0886260517752153>.  
529 PMID:6158791
- 530 9. Reynolds Z, Gottert A, Luben E, Mamba B, Shabangu P, Dlamini N, et al. Who are the male  
531 partners of adolescent girls and young women in Swaziland? Analysis of survey data from

- 532 community venues across 19 DREAMS districts. PloS one. 2018;13(9):e0203208.  
533 <http://dx.doi.org/10.1371/journal.pone.0203208>.
- 534 10. Ware E, Tura G, Alemu T, Andarge E. Disparities in risky sexual behavior among khat chewer  
535 and non- chewer college students in Southern Ethiopia: a comparative cross-sectional study.  
536 BMC public health. 2018;18(1):558. <http://dx.doi.org/10.1186/s12889-018-5405-x>.
- 537 11. Faini D, Hanson C, Baisley K, Kapiga S, Hayes R. Sexual behaviour, changes in sexual  
538 behaviour and associated factors among women at high risk of HIV participating in feasibility  
539 studies for prevention trials in Tanzania. PloS one. 2020;15(4):e0231766.  
540 <http://dx.doi.org/10.1371/journal.pone.0231766>.
- 541 12. Mmbaga EJ, Leyna GH, Leshabari MT, Moen K. Early Anal Sex Experience Among Men Who  
542 Have Sex with Men in Dar Es Salaam Tanzania: Implications for HIV Prevention and Care.  
543 Archives of sexual behavior. 2019. <http://dx.doi.org/10.1007/s10508-019-01529-5>.
- 544 13. Stoebenau K, Nair RC, Rambeloso V, Rakotoarison PG, Razafintsalama V, Labonte R.  
545 Consuming sex: The association between modern goods, lifestyles and sexual behaviour among  
546 youth in Madagascar. Globalization and health. 2013;9(1):13. [http://dx.doi.org/10.1186/1744-  
547 8603-9-13](http://dx.doi.org/10.1186/1744-8603-9-13).
- 548 14. Chea SK, Kagonya VA, Abdullahi O, Abubakar AA, Abbeddou S, Michielsen K, et al. Sexual  
549 risk-taking behavior amongst emerging adults in Africa: a systematic review and meta-analysis.  
550 medRxiv. 2022:2022.09.13.22279893. <http://dx.doi.org/10.1101/2022.09.13.22279893>.
- 551 15. United Nations. UNAIDS DATA 2020. Geneva, Switzerland; 2020.  
552 <https://www.unaids.org/en/resources/documents/2020/un aids-data> Accessed 09/04/2022
- 553 16. National AIDS and STI Control Program. 2020 World AIDS day report. Kenya HIV progress  
554 indicators. Nairobi; 2020. <https://app.box.com/s/kb1f0tkbjhlc2a610too8vlpixqla8> Accessed  
555 02/10/2022
- 556 17. Levinson D. The seasons of a man's life. New York: Ballantine books, an imprint of the Random  
557 House Publishing Group, a division of random House Inc, New York; 1978.
- 558 18. Arnett JJ. Emerging adulthood: A theory of development from the late teens through the twenties.  
559 American Psychologist. 2000;55(5):469-80. <http://dx.doi.org/10.1037//0003-066x.55.5.469>.
- 560 19. National AIDS Control Council. Kilifi County HIV and AIDS strategic plan 2016-2020. 2016.  
561 <https://nacc.or.ke/wp-content/uploads/2021/08/kilifi.pdf> Accessed 02/10/2022
- 562 20. National Crime Research Centre. . Gender based violence in Kenya. Nairobi; 2014.  
563 [https://crimeresearch.go.ke/wp-content/uploads/2018/02/wwwroot\\_publications\\_Gender-Based-  
564 Violence-in-Kenya.pdf](https://crimeresearch.go.ke/wp-content/uploads/2018/02/wwwroot_publications_Gender-Based-Violence-in-Kenya.pdf) Accessed 02/10/2022

- 565 21. Blum Rw Fau - McNeely C, McNeely C Fau - Nonnemaker J, Nonnemaker J. Vulnerability, risk,  
566 and protection. *J Adolesc Health*. 2002;31(1054-139X (Print)). 10.1016/s1054-139x(02)00411-1.  
567 PMID: 12093609.
- 568 22. Rusoja EA-O, Haynie DA-O, Sievers JA-O, Mustafee NA-O, Nelson FA-O, Reynolds MA-O, et  
569 al. Thinking about complexity in health: A systematic review of the key systems thinking and  
570 complexity ideas in health. *J Eval Clin Pract* 2018;24(3):600-6. <http://dx.doi.org/10.1111/jep.12856>.  
571 PMID: 29380477
- 572 23. Cassidy R, Borghi J, Semwanga AR, Binyaruka P, Singh NS, Blanchet K. How to do (or not to  
573 do)...using causal loop diagrams for health system research in low and middle-income settings.  
574 *Health Policy and Planning*. 2022;00(00):1-9. <http://dx.doi.org/10.1093/heapol/czac064>.
- 575 24. Agardh A, Cantor-Graae E, Ostergren P-O. Youth, sexual risk-taking behavior, and mental  
576 health: A study of university students in Uganda. *International journal of behavioral medicine*.  
577 2012;19(2):208-16. <http://dx.doi.org/10.1007/s12529-011-9159-4>.
- 578 25. Hoffman S, Levasseur M, Mantell JE, Beksinska M, Mabude Z, Ngoloyi C, et al. Sexual and  
579 reproductive health risk behaviours among South African university students: results from a  
580 representative campus-wide survey. *African journal of AIDS research : AJAR*. 2017;16(1):1-10.  
581 <http://dx.doi.org/10.2989/16085906.2016.1259171>. PMID:5563261
- 582 26. Bulled NL. Social models of HIV risk among young adults in Lesotho. *African Journal of AIDS  
583 Research*. 2015;14(3):239-54. <http://dx.doi.org/10.2989/16085906.2015.1054295>.
- 584 27. Choudhry V, Agardh A, Stafstrom M, Ostergren PO. Patterns of alcohol consumption and risky  
585 sexual behavior: a cross-sectional study among Ugandan university students. *BMC public health*.  
586 2014;14:128. <http://dx.doi.org/10.1186/1471-2458-14-128>.
- 587 28. Dingeta T, Oljira L, Assefa N. Patterns of sexual risk behavior among undergraduate university  
588 students in Ethiopia: a cross-sectional study. *The Pan African medical journal*. 2012;12:33.  
589 PMID:3415054
- 590 29. Gebresllasie F, Tsadik M, Berhane E. Potential predictors of risk sexual behavior among private  
591 college students in Mekelle City, North Ethiopia. *PloS one*. 2017;28:151.  
592 <http://dx.doi.org/10.1371/journal.pone.0197479> PMID:5978990
- 593 30. Imaledo JA, Peter-Kio OB, Asuquo EO. Pattern of risky sexual behavior and associated factors  
594 among undergraduate students of the University of Port Harcourt, Rivers State, Nigeria. *The Pan  
595 African medical journal*. 2012;12:97.
- 596 31. Mehra D, Kyagaba E, Ostergren PO, Agardh A. Association between self-reported academic  
597 performance and risky sexual behavior among Ugandan university students- a cross sectional

- 598 study. Global journal of health science. 2014;6(4):183-95.  
599 <http://dx.doi.org/10.5539/gjhs.v6n4p183>.
- 600 32. Mulu W, Yimer M, Abera B. Sexual behaviours and associated factors among students at Bahir  
601 Dar University: a cross sectional study. Reproductive health. 2014;11:84.  
602 <http://dx.doi.org/10.1186/1742-4755-11-84>.
- 603 33. Othieno CJ, Okoth R, Peltzer K, Pengpid S, Malla LO. Risky HIV sexual behaviour and  
604 depression among University of Nairobi students. Annals of General Psychiatry. 2015;14(1):16.  
605 <http://dx.doi.org/10.1186/s12991-015-0054-2>.
- 606 34. Peltzer K, Pengpid S. Mental health correlates of HIV risk behaviour and STIs/HIV infection  
607 among university students from 22 low, middle and high income countries. Journal of Psychology  
608 in Africa. 2015;25(2):121-6.
- 609 35. Peltzer K, Pengpid S, Tiembre I. Mental health, childhood abuse and HIV sexual risk behaviour  
610 among university students in Ivory Coast. Annals of General Psychiatry. 2013;12.  
611 <http://dx.doi.org/10.1186/1744-859X-12-18>.
- 612 36. Salawu AT, Reis SO, Fawole OI, Dairo MD. Sexual behaviour and use of electronic media  
613 among undergraduates in the University of Ibadan. African journal of medicine and medical  
614 sciences. 2015;44(4):321-7.
- 615 37. Samuel L, Angamo MT. Substance use and sexual risk behavior and factors associated with HIV  
616 transmission in Southern Ethiopia. International Journal of Pharmaceutical Sciences and  
617 Research. 2012;3(4):1080-6.
- 618 38. Wasie B, Belyhun Y, Moges B, Amare B. Effect of emergency oral contraceptive use on condom  
619 utilization and sexual risk taking behaviours among university students, Northwest Ethiopia: a  
620 cross-sectional study. BMC research notes. 2012;5:501. <http://dx.doi.org/10.1186/1756-0500-5-501>. PMID:3494538  
621
- 622 39. Pengpid S, Peltzer K, Skaal L. Mental health and HIV sexual risk behaviour among University of  
623 Limpopo students. South African Journal of Psychiatry. 2013;19(2):25-30.  
624 <http://dx.doi.org/10.7196/SAJP.415>.
- 625 40. Somba MJ, Mbonile M, Obure J, Mahande MJ. Sexual behaviour, contraceptive knowledge and  
626 use among female undergraduates' students of Muhimbili and Dar es Salaam Universities,  
627 Tanzania: a cross-sectional study. BMC women's health. 2014;14:94.  
628 <http://dx.doi.org/10.1186/1472-6874-14-94>. PMID:4126911
- 629 41. Oye-Adeniran BA, Aina OF, Gbadegesin A, Ekanem EE. Substance use and sexual behaviour  
630 among female students in Nigerian universities. International quarterly of community health  
631 education. 2014;35(1):73-83. <http://dx.doi.org/10.2190/IQ.35.1.f>.

- 632 42. Ngatu NR, Hirota R, Eitoku M, Muzembo BA, Nishimori M, Kuramochi M, et al. Perception of  
633 the risk of sexual transmission of HIV among Congolese and Japanese university students.  
634 Environmental health and preventive medicine. 2012;17(2):139-46.  
635 <http://dx.doi.org/10.1007/s12199-011-0232-z>.
- 636 43. Pence BW, Whetten K, Shirey KG, Yao J, Thielman NM, Whetten R, et al. Factors associated  
637 with change in sexual transmission risk behavior over 3 years among HIV-infected patients in  
638 Tanzania. PloS one. 2013;8(12). <http://dx.doi.org/10.1371/journal.pone.0082974>.
- 639 44. Ahmed ZD, Ibrahim BS, Bolaji ML, Mohammed Y, Nguku P. Knowledge and utilization of  
640 contraceptive devices among unmarried undergraduate students of a tertiary institution in Kano  
641 State, Nigeria 2016. Journal of Obstetrics and Gynaecology Research. 2017;43(Supplement  
642 1):137. <http://dx.doi.org/10.1111/jog.13393>.
- 643 45. Zhang J, Tang BW, Liu MW, Yuan S, Yu HJ, Zhang R, et al. Association of Adverse Childhood  
644 Experiences with Health Risk Behaviors Among College Students in Zambia. International  
645 journal of behavioral medicine. 2020. <http://dx.doi.org/10.1007/s12529-020-09863-y>.
- 646 46. Peltzer K, Jones D, Weiss SM, Villar-Loubet O, Shikwane E. Sexual risk, serostatus and intimate  
647 partner violence among couples during pregnancy in rural South Africa. AIDS and behavior.  
648 2013;17(2):508-16. <http://dx.doi.org/10.1007/s10461-012-0185-2>.
- 649 47. World Health Organization. Global school-based student health survey 2021 version Geneva;  
650 2015. [https://cdn.who.int/media/docs/default-source/ncds/ncd-](https://cdn.who.int/media/docs/default-source/ncds/ncd-surveillance/gshs/gshs_core_module_questions_2021.pdf?sfvrsn=7d07af8_7&download=true)  
651 [surveillance/gshs/gshs\\_core\\_module\\_questions\\_2021.pdf?sfvrsn=7d07af8\\_7&download=true](https://cdn.who.int/media/docs/default-source/ncds/ncd-surveillance/gshs/gshs_core_module_questions_2021.pdf?sfvrsn=7d07af8_7&download=true)  
652 Accessed 02/10/2022
- 653 48. Smith J, Firth J. Qualitative data analysis: the framework approach. Nurse researcher.  
654 2011;18(2):52-62.
- 655 49. Patton R, Deluca P Fau - Kaner E, Kaner E Fau - Newbury-Birch D, Newbury-Birch D Fau -  
656 Phillips T, Phillips T Fau - Drummond C, Drummond C. Alcohol screening and brief intervention  
657 for adolescents: the how, what and where of reducing alcohol consumption and related harm  
658 among young people. Alcohol Alcohol. 2014;49(2):207-12(1464-3502 (Electronic)).  
659 10.1093/alcalc/agt165. PMID:3932830.
- 660 50. Ministry of Education Science and Technology, Kenya. Kenyan education sector support  
661 program 2005-2010. Nairobi; 2005.  
662 [https://planipolis.iiep.unesco.org/sites/default/files/ressources/kenya\\_kessp\\_final\\_2005.pdf](https://planipolis.iiep.unesco.org/sites/default/files/ressources/kenya_kessp_final_2005.pdf)  
663 Accessed 02/10/2022



- 664 51. Otieno MA, Ochieng JA. Impact of 100 Per Cent Transition Policy on Public Secondary Schools  
665 in Machakos Sub- County, Kenya: Focusing on Coping Strategies. *Journal of Education and*  
666 *Practice*. 2020;24.
- 667 52. Commission for University Education. University statistics 2017/2018. 2018.  
668 [https://www.cue.or.ke/index.php?option=com\\_phocadownload&view=category&id=18:universiti](https://www.cue.or.ke/index.php?option=com_phocadownload&view=category&id=18:universiti)  
669 [es-data-0-3&Itemid=187](https://www.cue.or.ke/index.php?option=com_phocadownload&view=category&id=18:universiti&es-data-0-3&Itemid=187) Accessed 02/10/2022
- 670 53. Higher Education Loans Board. The 2020/2021 HELB sustainability report. 2021.  
671 <https://www.helb.co.ke/wp-content/uploads/2021/11/HELB-SUSTAINABILITY-REPORT.pdf>  
672 Accessed 02/10/2022
- 673 54. Ssewanyana D, Mwangala PN, Marsh V, Jao I, van Baar A, Newton CR, et al. Young people's  
674 and stakeholders' perspectives of adolescent sexual risk behavior in Kilifi County, Kenya: A  
675 qualitative study. *Journal of Health Psychology*. 2018;23(2):188–205.  
676 10.1177/1359105317736783. 29076401
- 677 55. Gómez-Lugo M, Morales A, Saavedra-Roa A, Niebles-Charris J, Abello-Luque D, Marchal-  
678 Bertrand L, et al. Effects of a Sexual Risk-Reduction Intervention for Teenagers: A Cluster-  
679 Randomized Control Trial. *AIDS and Behavior*. 2022;26(7):2446-58. 10.1007/s10461-022-  
680 03574-z.

681

## 682 **Supporting information**

683 **S1 File. Interview guide**

684 **S2 File. Causal structure diagram**

685

## 686 **Author contributions**

687 Conceptualization - SC, AH, AAA (Amina Abubakar), KM, SA, AA (Alice Anika), FI, VK, OA

688 Data curation – SC, AAA, VK, KM, EO, IM, CN

689 Formal analysis – SC, AAA, KM

690 Funding acquisition – AH, AAA

691 Investigation – SC, KM, SA, AH

692 Methodology – SC, AH, KM, SA, AAA

693 Project administration – OA, AAA, AH

694 Resources – SA, KM, AAA, AA, FI

695 Supervision – KM, SA, AH, OA

696 Validation – KM, SA, AH, AA, VK, OA, FI, AAA

697 Visualization – SC, VK, EO, IM, CN

698 Writing- original draft preparation – SC

699 Writing – review and editing – KM, SA, AH, AAA, VK, OA, AA, FI, EO, IM, CN

## 700 **Funding**

701 This work was partially funded by the Medical Research Council [Grant number  
702 MR/M025454/1] to AAA. This award is jointly funded by the UK Medical Research Council  
703 (MRC) and the UK Department for International Development (DFID) under MRC/DFID  
704 concordant agreement and is also part of the EDCTP2 program supported by the European  
705 Union. The authors are also grateful for the support of the Sub-Saharan African Network for  
706 TB/HIV-1 Research Excellence (SANTHE), a DELTAS Africa Initiative [grant number DEL-  
707 15–006] to AH. The DELTAS Africa Initiative is an independent funding scheme of the African  
708 Academy of Sciences (AAS)’s Alliance for Accelerating Excellence in Science in Africa  
709 (AESA) and supported by the New Partnership for Africa’s Development Planning and  
710 Coordinating Agency (NEPAD Agency) with funding from the Wellcome Trust [grant number  
711 107752/Z/15/Z] and the UK government. The funders had no role in study design, data collection  
712 and analysis, decision to publish, or preparation of the manuscript. The funders had no role in the  
713 study design, data collection and analysis, decision to publish or preparation of the manuscript.

## 714 **Conflict of interest**

715 The authors declare that there are no conflicts of interest regarding the publication of this paper.

716

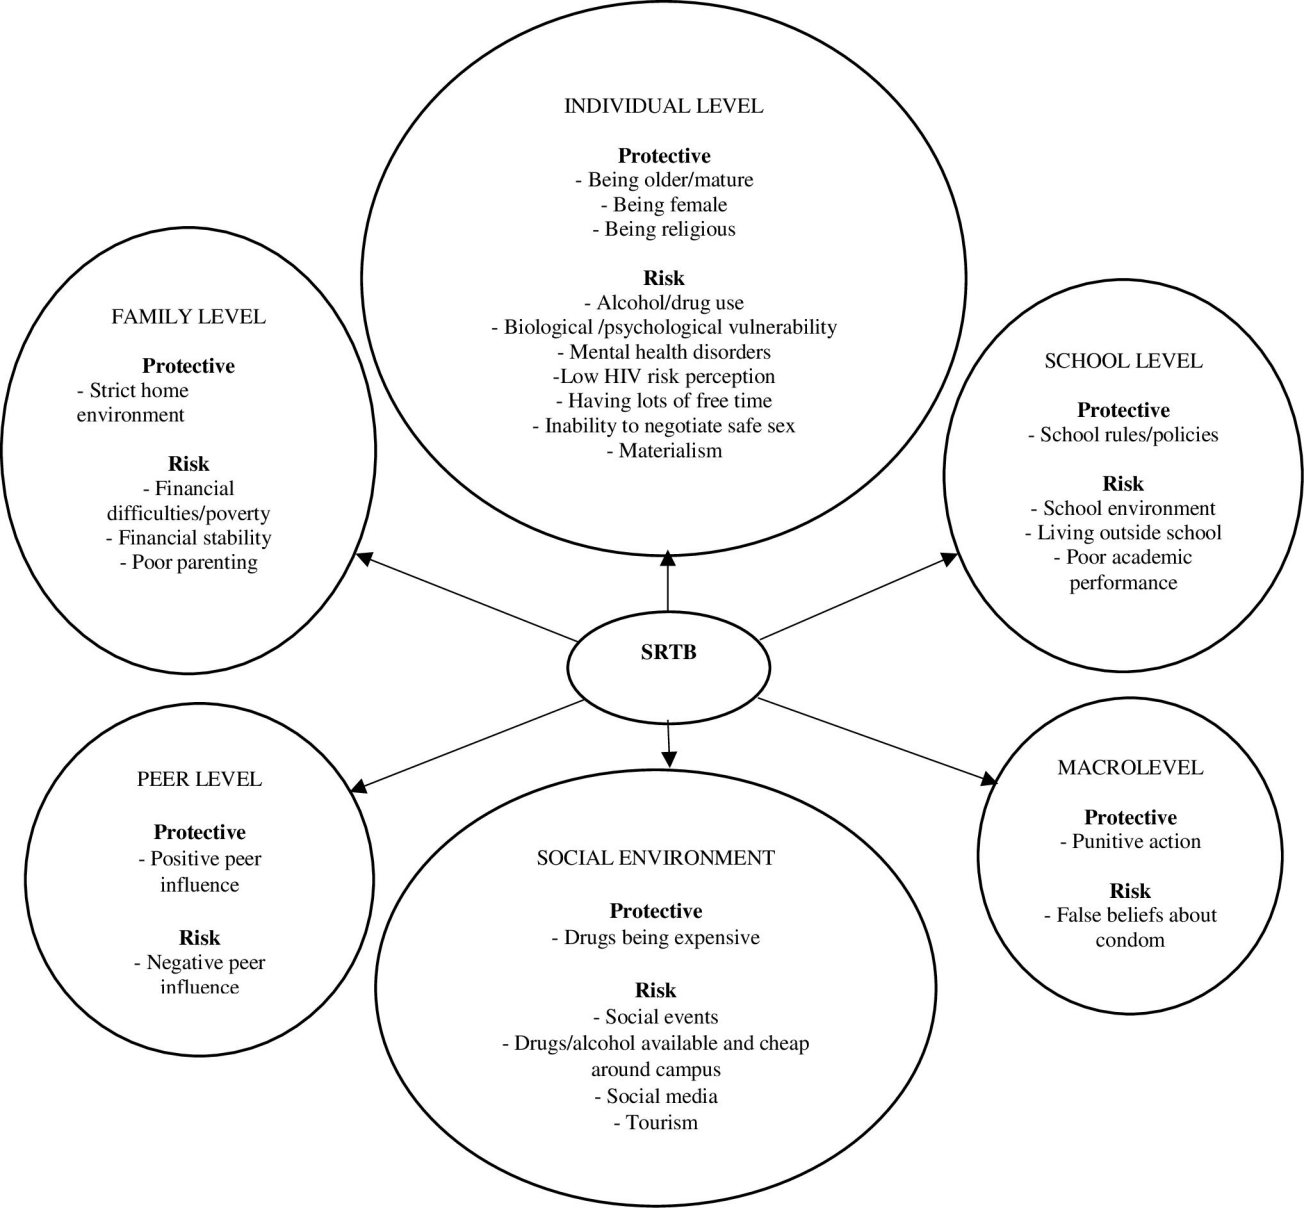

Source: https://medrxiv.org/content/10.1101/2023.04.06.23288135.full.pdf
